# Supplementary material for: Analytical Performance of the Commercial MucorGenius® Assay as Compared to an In-House qPCR Assay to Detect Mucorales DNA in Serum Specimens
Source: MDPI journal article supplement (doi:10.3390/jof8080786), 2022-07-27
Supplement: s1 [file s1]

# Analytical performance of the commercial MucorGenius® assay as compared to an in-house qPCR assay to detect Mucorales DNA in serum specimens

Supplementary

**Table S1.** Patient characteristics and quantification cycle (Cq) of the two evaluated real-time PCR.

| Patient    | Underlying disease  | Classification <sup>1</sup> | IFD | Involved species            | Sample    | Positive qPCR | In-house qPCR <sup>2</sup> |         | MucorGenius® <sup>2</sup><br>present |
|------------|---------------------|-----------------------------|-----|-----------------------------|-----------|---------------|----------------------------|---------|--------------------------------------|
|            |                     |                             |     |                             |           |               | initial                    | present |                                      |
| Patient 1  | SOT and DM          | Probable                    | RM  | na                          | Sample 01 | Rmuc          | 39.24                      | 50      | 50                                   |
| Patient 2  | Critically ill burn | Proven                      | IWB | <i>Mucor circinelloides</i> | Sample 02 | Muc           | 34.54                      | 38.3    | 50                                   |
|            |                     |                             |     |                             | Sample 03 | Muc           | 35.08                      | 39.86   | 50                                   |
|            |                     |                             |     |                             | Sample 04 | Muc           | 35.31                      | 50      | 44.55                                |
|            |                     |                             |     |                             | Sample 05 | Muc           | 35.81                      | 37.79   | 50                                   |
| Patient 3  | ALL                 | Proven                      | RM  | na                          | Sample 06 | Muc           | 37.19                      | 50      | 50                                   |
|            |                     |                             |     |                             | Sample 07 | Muc           | 37.94                      | 50      | 50                                   |
|            |                     |                             |     |                             | Sample 08 | Muc           | 39.03                      | 50      | 50                                   |
| Patient 4  | ALL                 | Probable                    | PM  | na                          | Sample 09 | Rmuc          | 33.24                      | 35.22   | 39.2                                 |
| Patient 5  | Cirrhosis           | Proven                      | GM  | <i>Rhizopus oryzae</i>      | Sample 10 | Muc           | 33.56                      | 37.76   | 50                                   |
| Patient 6  | Critically ill burn | Proven                      | IWB | na                          | Sample 11 | Muc           | 39.92                      | 50      | 50                                   |
| Patient 7  | AML                 | Probable                    | PM  | na                          | Sample 12 | Muc           | 34.66                      | 39.56   | 36.72                                |
|            |                     |                             |     |                             | Sample 13 | Rmuc          | 30.74                      | 36.79   | 36.72                                |
| Patient 8  | Critically ill burn | Probable                    | IWB | na                          | Sample 14 | Muc           | 39.74                      | 50      | 50                                   |
| Patient 9  | AML                 | Probable                    | PM  | na                          | Sample 15 | Acory         | 36.04                      | 38.49   | 50                                   |
| Patient 10 | AML                 | Proven                      | RM  | <i>Rhizopus arrhizus</i>    | Sample 16 | Muc           | 38.98                      | 50      | 50                                   |
| Patient 11 | Critically ill burn | Proven                      | IWB | <i>Mucor circinelloides</i> | Sample 17 | Muc           | 35.47                      | 39.29   | 50                                   |
| Patient 12 | AML                 | Probable                    | RM  | <i>Rhizopus arrhizus</i>    | Sample 18 | Muc           | 35.5                       | 50      | 50                                   |
| Patient 13 | SOT                 | Probable                    | PM  | na                          | Sample 19 | Acory         | 37.86                      | 38.57   | 50                                   |

|            |                     |          |     |                             |           |       |       |       |    |
|------------|---------------------|----------|-----|-----------------------------|-----------|-------|-------|-------|----|
| Patient 14 | Critically ill burn | Proven   | IWB | <i>Mucor circinelloides</i> | Sample 20 | Acory | 38.36 | 50    | 50 |
|            |                     |          |     |                             | Sample 21 | Acory | 39.05 | 50    | 50 |
|            |                     |          |     |                             | Sample 22 | Acory | 39.26 | 39.95 | 50 |
|            |                     |          |     |                             | Sample 23 | Muc   | 37.1  | 40.3  | 50 |
|            |                     |          |     |                             | Sample 24 | Muc   | 38.21 | 50    | 50 |
| Patient 15 | Critically ill burn | Probable | IWB | na                          | Sample 25 | Acory | 36.81 | 50    | 50 |

<sup>1</sup> EORTC/MSG classification [11]; <sup>2</sup>Quantification cycle value.

Acory, *Lichtheimia* assay; ALL, acute lymphoid leukemia; AML, acute myeloid leukemia; DM, diabetes mellitus; GM, gastrointestinal mucormycosis; IWB, invasive wound mucormycosis; IFD, invasive fungal disease; Muc, *Mucor/Rhizopus* assay; na, not available; PM, pulmonary mucormycosis; qPCR, quantitative real-time polymerase chain reaction; RM, rhinocerebral mucormycosis; Rmuc, *Rhizomucor* assay; SOT, solid organ transplant.

**Table S2.** List of species used in the present study and their origin.

| Species                                       | Strain origin <sup>1</sup> |
|-----------------------------------------------|----------------------------|
| <i>Actinomucor elegans</i>                    | CNRMA 12.953               |
| <i>Apophysomyces elegans</i>                  | CNRMA 18.469               |
| <i>Cunninghamella bertholletiae</i>           | CNRMA 18.729               |
| <i>Lichtheimia corymbifera</i>                | CNRMA 19.036               |
| <i>Mucor indicus</i>                          | CNRMA 14.375               |
| <i>Rhizopus arrhizus</i> var. <i>arrhizus</i> | CNRMA 19.615               |
| <i>Rhizopus arrhizus</i> var. <i>delemar</i>  | CNRMA 19.267               |
| <i>Rhizopus microsporus</i>                   | CNRMA 14.351               |
| <i>Rhizomucor pusillus</i>                    | CNRMA 14.832               |
| <i>Saksenaea vasiformis</i>                   | CNRMA 8.1143               |
| <i>Syncephalastrum racemosum</i>              | CNRMA 17.439               |
| <i>Syncephalastrum monosporum</i>             | CBS 100.49                 |
| <i>Aspergillus flavus</i>                     | CNRMA 20.71                |
| <i>Aspergillus fumigatus</i>                  | CBS 101.355                |
| <i>Penicillium digitatum</i>                  | CNRMA 17.586               |

<sup>1</sup> CNRMA, French National Reference Center of invasive Mycoses and Antifungals; CBS, Fungal Biodiversity Centre.

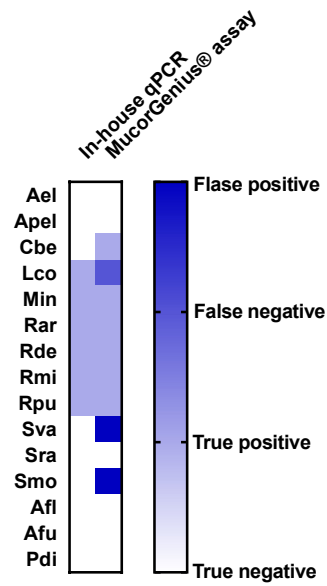

**Figure S1.** Assays performance based on spiked sera spiked with fungal DNA. *Actinomucor elegans* (Ael), *Apophysomyces elegans* (Apel), *Cunninghamella bertholletiae* (Cbe), *Lichtheimia corymbifera* (Lco), *Mucor indicus* (Min), *Rhizopus arrhizus* var. *arrhizus* (Rar), *Rhizopus arrhizus* var. *delemar* (Rde), *Rhizopus microsporus* (Rmi), *Rhizomucor pusillus* (Rpu), *Saksenaea vasiformis* (Sva), *Syncephalastrum racemosum* (Sra), *Syncephalastrum monosporum* (Smo) and *Aspergillus flavus* (Afl), *Aspergillus fumigatus* (Afu), *Penicillium digitatum* (Pdi).
